# Supplementary material for: Gold Nanoparticle Mesoporous Carbon Composite as Catalyst for Hydrogen Evolution Reaction
Source: MDPI journal article supplement (doi:10.3390/molecules29153707), 2024-08-05
Supplement: s1 [file molecules-3051120-supplementary.pdf › molecules-3051120-supplementary.pdf]

---

## Supplementary Materials

# Gold Nanoparticle Mesoporous Carbon Composite as Catalyst for Hydrogen Evolution Reaction

Erik Biehler, Qui Quach and Tarek M. Abdel-Fattah \*

Applied Research Center at Thomas Jefferson National Accelerator Facility, Department of Molecular Biology and Chemistry at Christopher Newport University, Newport News, VA 23606, USA

\* Correspondence: fattah@cnu.edu

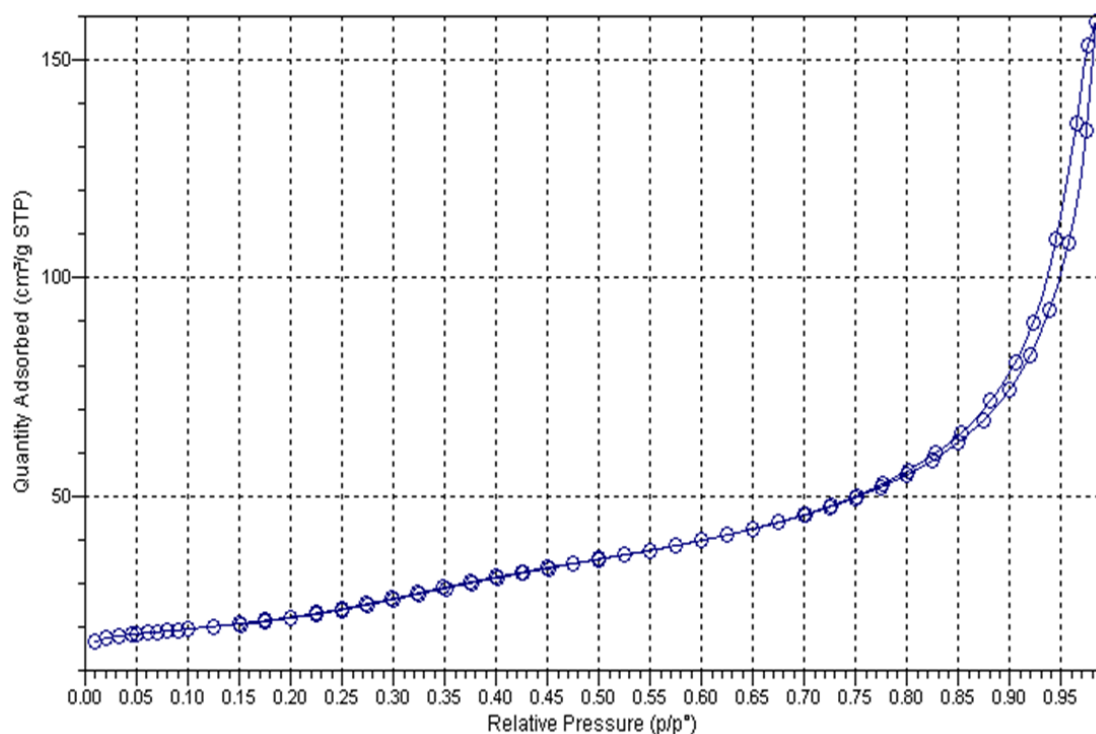

**Figure S1.** Nitrogen sorption/desorption isotherms generated at 77 K for Mesoporous Carbon.

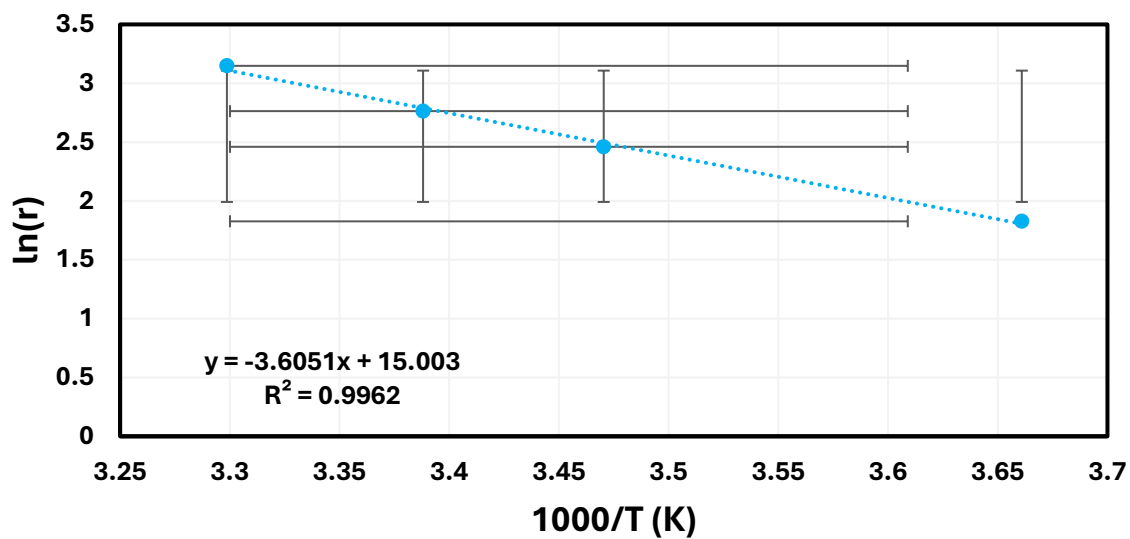

**Figure S2.** Arrhenius plot showing the Standard Deviation values for calculating the activation energy of a hydrogen generation reaction with the AuNP-MCM catalyst.

**Table S1.** Nitrogen Adsorption data for Mesoporous Carbon

|                                                                         |       |
|-------------------------------------------------------------------------|-------|
| BET Surface Area (m <sup>2</sup> /g)                                    | 79.7  |
| Single point adsorption total pore volume of pores (cm <sup>3</sup> /g) | 0.246 |
| BJH Adsorption average pore width (Å)                                   | 110   |
